# Supplementary material for: Accelerating the evaluation of crucial descriptors for catalyst screening via message passing neural network
Source: Royal Society of Chemistry journal article supplement (doi:10.1039/d2dd00088a), 2022-11-29
Supplement: d2dd00088a1.pdf [file d2dd00088a1.pdf]

Supplementary Information for

## **Accelerating the Evaluation of Crucial Descriptors for Catalyst Screening via Message Passing Neural Network**

Hieu A. Doan<sup>\*,a</sup> Chenyang Li,<sup>a</sup> Logan Ward,<sup>b</sup> Mingxia Zhou,<sup>a,c</sup> Larry A. Curtiss<sup>a</sup> and Rajeev S. Assary <sup>\*a</sup>

*<sup>a.</sup> Materials Science Division, Argonne National Laboratory, Lemont, Illinois 60439, United States.*

*<sup>b.</sup> Data Science and Learning Division, Argonne National Laboratory, Lemont, Illinois 60439, United States.*

*<sup>c.</sup> Present address: State Key Laboratory of Heavy Oil Processing, China University of Petroleum Beijing, Beijing 102249, China.*

\*Corresponding authors: HAD([hadoan@anl.gov](mailto:hadoan@anl.gov)), RSA ([assary@anl.gov](mailto:assary@anl.gov)), 630-252-3536

All relevant Python codes and instructions for running our LCG-MPNN models are provided on Github at <https://github.com/MolecularMaterials/nfp>. Data containing ~ 20,000 geometry optimizations using VASP were saved as Atomic Simulation Environment databases and can be downloaded from the Materials Data Facility using the following link:

[https://acdc.alcf.anl.gov/mdf/detail/doan\\_datasets\\_accelerating\\_representations\\_v1.1/](https://acdc.alcf.anl.gov/mdf/detail/doan_datasets_accelerating_representations_v1.1/)

## Table of Content

|                                                                                                                                                                                                                                                                                           | Page |
|-------------------------------------------------------------------------------------------------------------------------------------------------------------------------------------------------------------------------------------------------------------------------------------------|------|
| <b>Figure S1:</b> Scheme for generating oxygen binding geometries on Mo <sub>2</sub> C surfaces                                                                                                                                                                                           | S3   |
| <b>Figure S2:</b> List of dopant elements                                                                                                                                                                                                                                                 | S3   |
| <b>Figure S3:</b> The top (left) and side (right) view of a typical (1x1) surface unit cell used in this work. In this particular example, the Mo <sub>2</sub> C(100) facet is doped with a Ag atom. The Mo, Ag, and C atoms are shown in green, light gray, and dark gray, respectively. | S4   |
| <b>Figure S4:</b> Skin distance analysis to determine the appropriate cut-off value for bonded interaction among atoms                                                                                                                                                                    | S4   |
| <b>Figure S5:</b> Oxygen binding energy (BE <sub>O</sub> ) distribution with respect to seven low Miller-index surfaces of pristine and doped Mo <sub>2</sub> C                                                                                                                           | S5   |
| <b>Figure S6:</b> Prediction accuracy, measured as MAE between BE <sub>O</sub> <sup>ML</sup> and BE <sub>O</sub> , of the LCG-MPNN model with respect to seven different low Miller-index surfaces of pristine and doped Mo <sub>2</sub> C                                                | S6   |
| <b>Figure S7:</b> 2D t-distributed Stochastic Neighbor Embedding (t-SNE) plot of graph-level features from the readout layer                                                                                                                                                              | S7   |
| <b>Figure S8:</b> 2D t-distributed Stochastic Neighbor Embedding (t-SNE) plot of graph-level features from the readout layer                                                                                                                                                              | S8   |
| <b>Table S1:</b> Hyperparameter optimization using 200 trials of Tree Parzen Estimator method                                                                                                                                                                                             | S9   |
| <b>References</b>                                                                                                                                                                                                                                                                         | S14  |

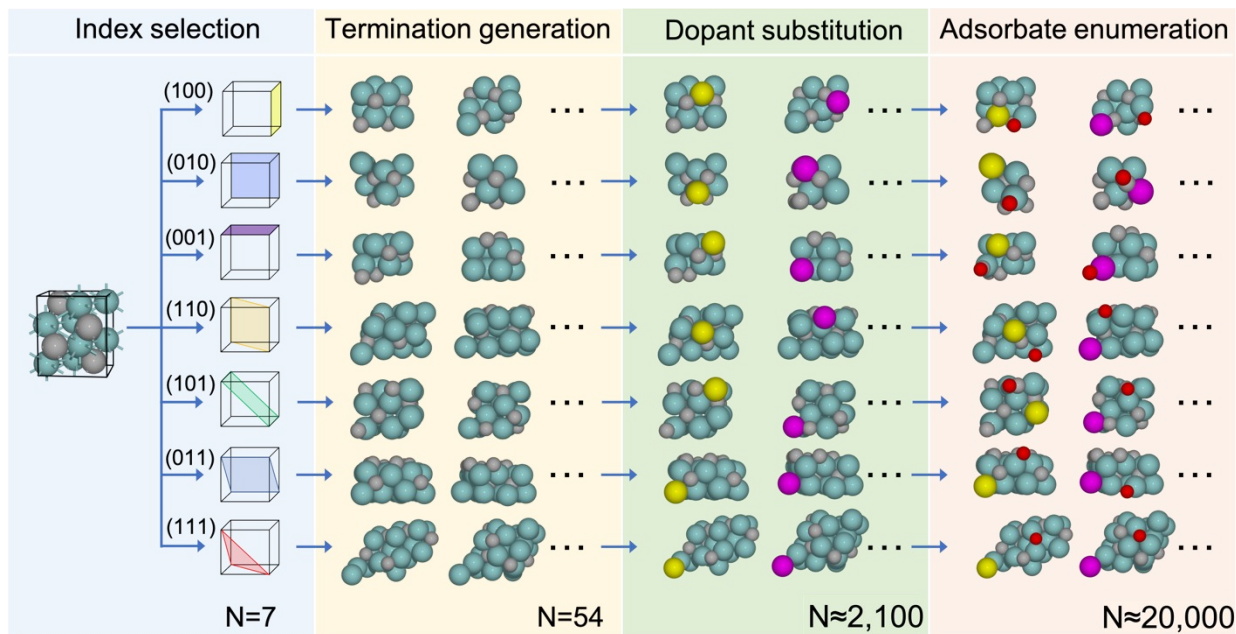

Figure S1 Scheme for generating oxygen binding geometries on  $\text{Mo}_2\text{C}$  surfaces. Top view of example surfaces is shown. N indicates the number of possible configurations (e.g., 7 low Miller-index surfaces were selected and cut from the bulk unit cell of orthorhombic  $\text{Mo}_2\text{C}$ ). The atom color code is green for Mo, grey for C, yellow/magenta for a dopant atom, and red for O.

|                 |                 |                  |                  |                  |                  |                  |                  |                  |                  |                  |                  |                  |                  |                  |                  |                  |                  |
|-----------------|-----------------|------------------|------------------|------------------|------------------|------------------|------------------|------------------|------------------|------------------|------------------|------------------|------------------|------------------|------------------|------------------|------------------|
| 1<br><b>H</b>   |                 |                  |                  |                  |                  |                  |                  |                  |                  |                  |                  |                  |                  |                  |                  |                  | 2<br><b>He</b>   |
| 3<br><b>Li</b>  | 4<br><b>Be</b>  |                  |                  |                  |                  |                  |                  |                  |                  |                  |                  | 5<br><b>B</b>    | 6<br><b>C</b>    | 7<br><b>N</b>    | 8<br><b>O</b>    | 9<br><b>F</b>    | 10<br><b>Ne</b>  |
| 11<br><b>Na</b> | 12<br><b>Mg</b> |                  |                  |                  |                  |                  |                  |                  |                  |                  |                  | 13<br><b>Al</b>  | 14<br><b>Si</b>  | 15<br><b>P</b>   | 16<br><b>S</b>   | 17<br><b>Cl</b>  | 18<br><b>Ar</b>  |
| 19<br><b>K</b>  | 20<br><b>Ca</b> | 21<br><b>Sc</b>  | 22<br><b>Ti</b>  | 23<br><b>V</b>   | 24<br><b>Cr</b>  | 25<br><b>Mn</b>  | 26<br><b>Fe</b>  | 27<br><b>Co</b>  | 28<br><b>Ni</b>  | 29<br><b>Cu</b>  | 30<br><b>Zn</b>  | 31<br><b>Ga</b>  | 32<br><b>Ge</b>  | 33<br><b>As</b>  | 34<br><b>Se</b>  | 35<br><b>Br</b>  | 36<br><b>Kr</b>  |
| 37<br><b>Rb</b> | 38<br><b>Sr</b> | 39<br><b>Y</b>   | 40<br><b>Zr</b>  | 41<br><b>Nb</b>  | 42<br><b>Mo</b>  | 43<br><b>Tc</b>  | 44<br><b>Ru</b>  | 45<br><b>Rh</b>  | 46<br><b>Pd</b>  | 47<br><b>Ag</b>  | 48<br><b>Cd</b>  | 49<br><b>In</b>  | 50<br><b>Sn</b>  | 51<br><b>Sb</b>  | 52<br><b>Te</b>  | 53<br><b>I</b>   | 54<br><b>Xe</b>  |
| 55<br><b>Cs</b> | 56<br><b>Ba</b> | 71<br><b>Lu</b>  | 72<br><b>Hf</b>  | 73<br><b>Ta</b>  | 74<br><b>W</b>   | 75<br><b>Re</b>  | 76<br><b>Os</b>  | 77<br><b>Ir</b>  | 78<br><b>Pt</b>  | 79<br><b>Au</b>  | 80<br><b>Hg</b>  | 81<br><b>Tl</b>  | 82<br><b>Pb</b>  | 83<br><b>Bi</b>  | 84<br><b>Po</b>  | 85<br><b>At</b>  | 86<br><b>Rn</b>  |
| 87<br><b>Fr</b> | 88<br><b>Ra</b> | 103<br><b>Lr</b> | 104<br><b>Rf</b> | 105<br><b>Db</b> | 106<br><b>Sg</b> | 107<br><b>Bh</b> | 108<br><b>Hs</b> | 109<br><b>Mt</b> | 110<br><b>Ds</b> | 111<br><b>Rg</b> | 112<br><b>Cn</b> | 113<br><b>Nh</b> | 114<br><b>Fl</b> | 115<br><b>Mc</b> | 116<br><b>Lv</b> | 117<br><b>Ts</b> | 118<br><b>Og</b> |

Figure S2 List of dopant elements (highlighted in green) used in this work

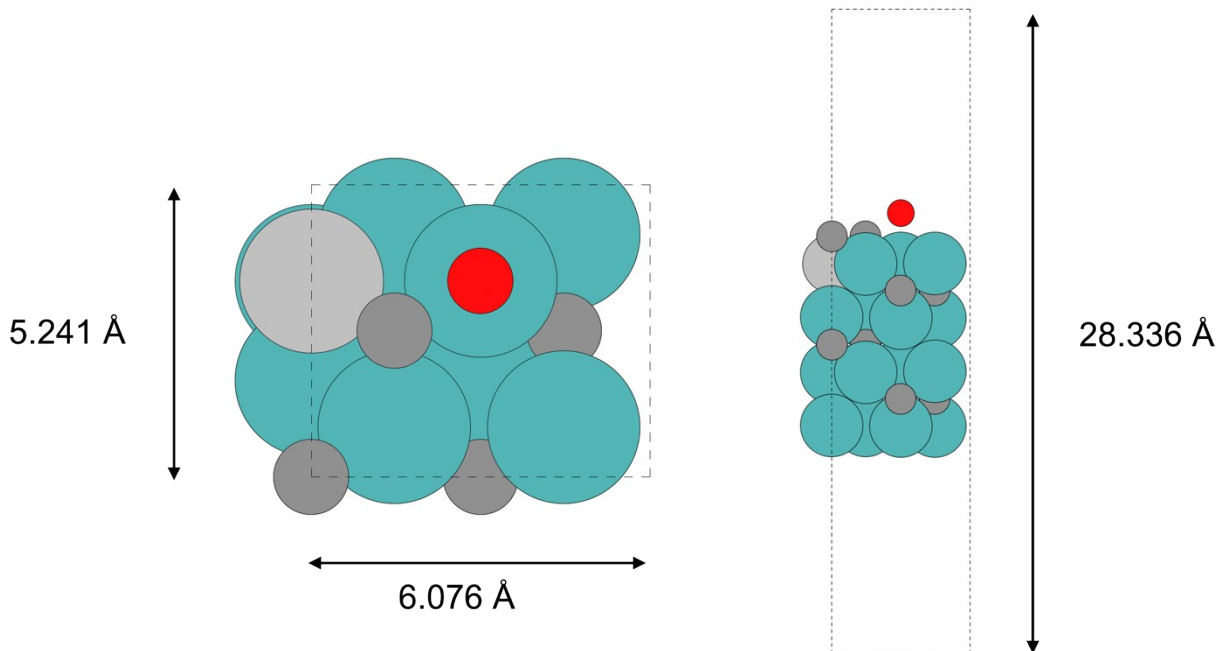

Figure S3 The top (left) and side (right) view of a typical (1x1) surface unit cell used in this work. In this particular example, the  $\text{Mo}_2\text{C}(100)$  facet is doped with a Ag atom. The Mo, Ag, and C atoms are shown in green, light gray, and dark gray, respectively.

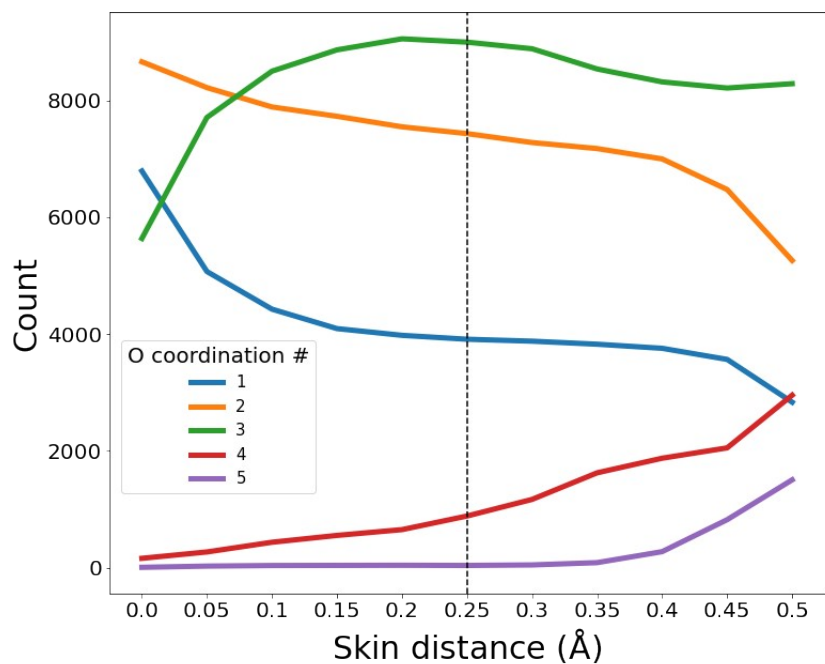

Figure S4 Skin distance analysis to determine the appropriate cut-off value for bonded interaction among atoms

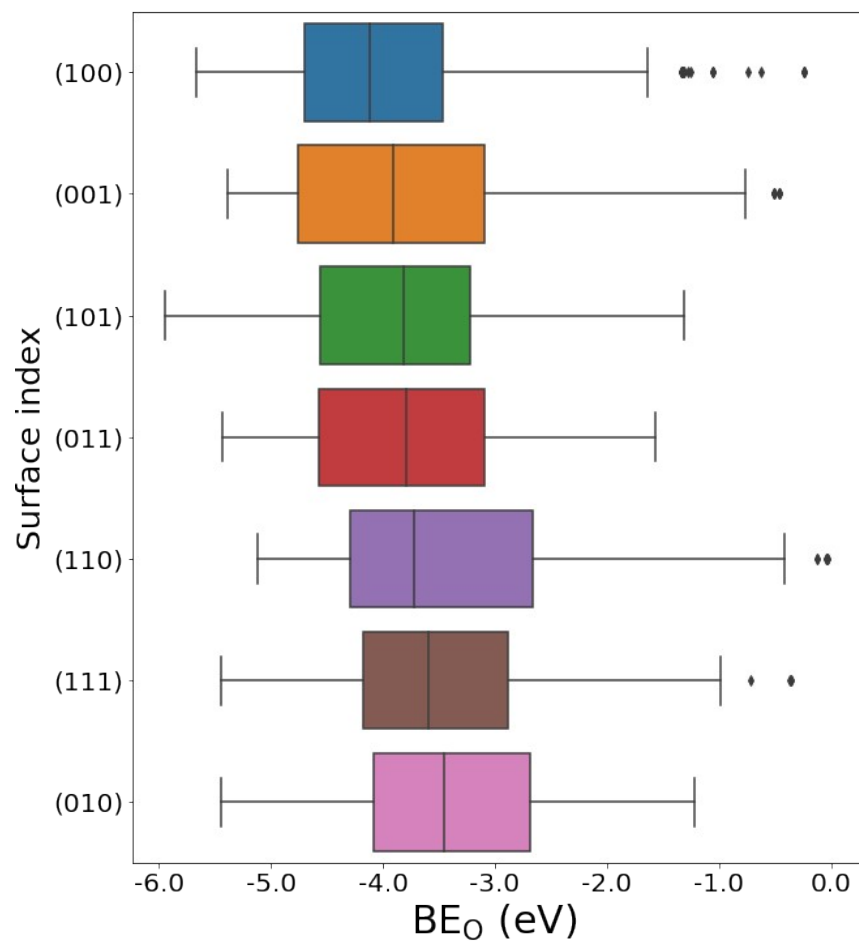

Figure S5 DFT computed oxygen binding energy ( $BE_O$ ) distribution with respect to seven low Miller-index surfaces of pristine and doped  $Mo_2C$

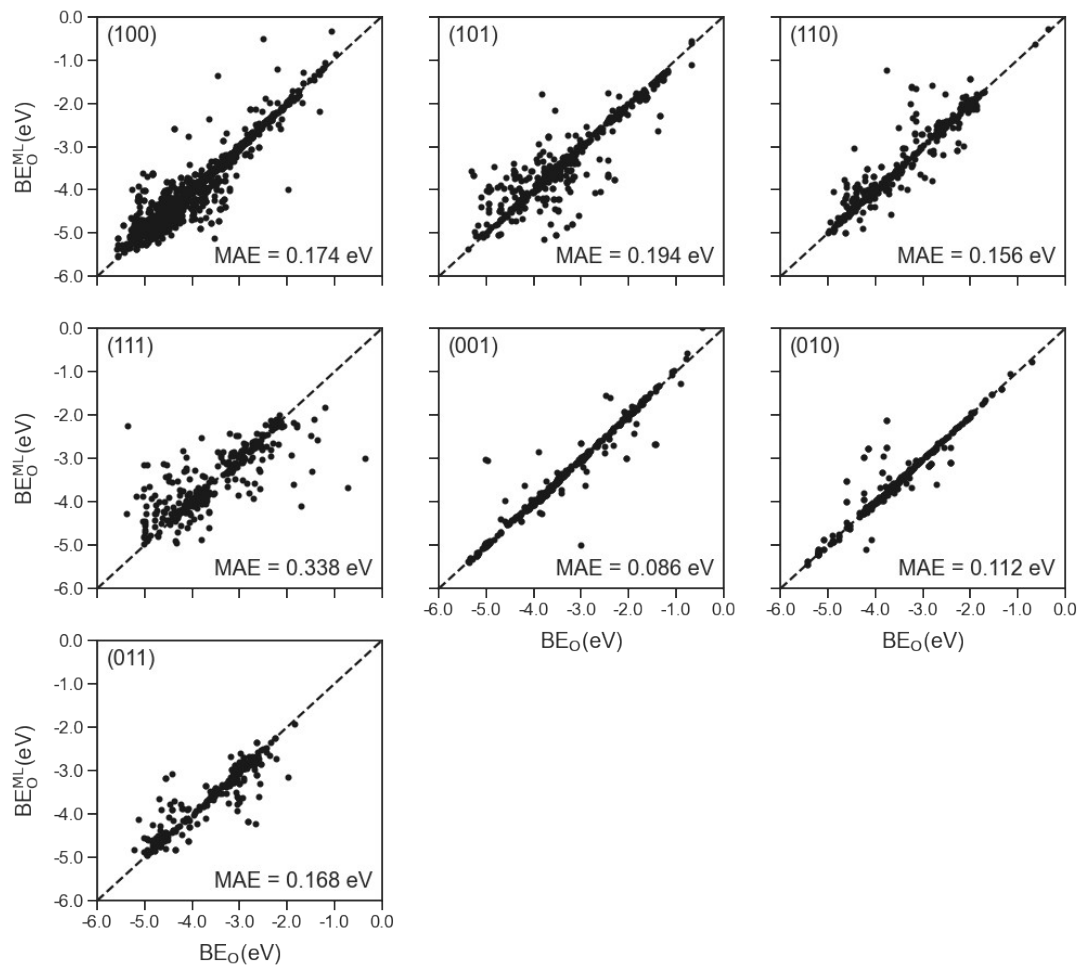

Figure S6 Prediction accuracy, measured as MAE between  $BE_O^{ML}$  and  $BE_O$ , of the LCG-MPNN model with respect to seven low Miller-index surfaces of pristine and doped  $Mo_2C$  in the test set

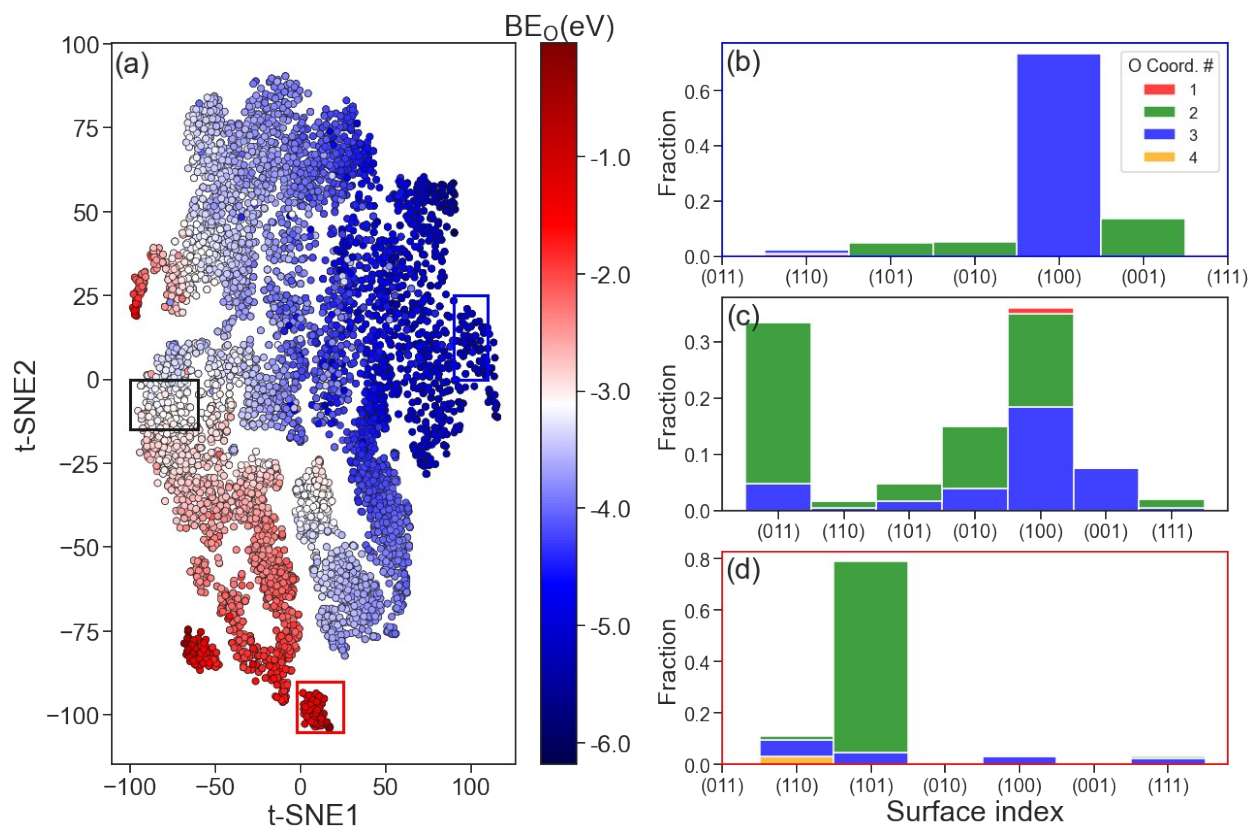

Figure S7 a) 2D t-distributed Stochastic Neighbor Embedding (t-SNE) plot of graph-level features from the readout layer. Each point represents an adsorption geometry from the training set, of which color was mapped to the computed oxygen binding energy ( $BE_O$ ). The oxygen coordination number distribution of adsorption geometries in the regions enclosed by blue, black, and red rectangles are shown in (b), (c), and (d), respectively.

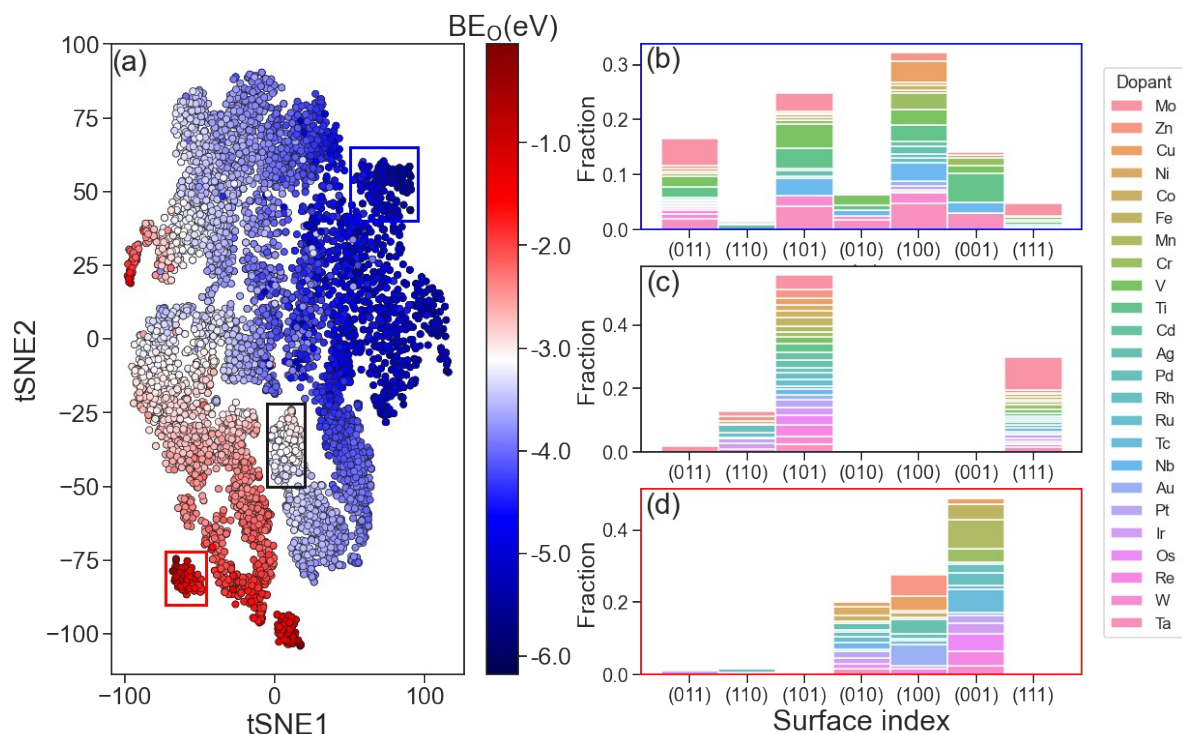

Figure S8 a) 2D t-distributed Stochastic Neighbor Embedding (t-SNE) plot of graph-level features from the readout layer. Each point represents an adsorption geometry from the training set, of which color was mapped to the computed oxygen binding energy ( $BE_O$ ). The dopant element distribution of adsorption geometries in blue, black, and red regions are shown in (b), (c), and (d), respectively. The selected regions in this plot are identical to the ones in Fig. 5 of the main text.



Table S1 Hyperparameter optimization using 200 trials of Tree Parzen Estimator method.<sup>1</sup> The best set of hyperparameters was found in trial #118.

| Trial # | Batch size | Dense 1 | Dense 2 | Dense 3 | Learning rate | No. of message passing steps | Read-out | Validation MAE (eV) |
|---------|------------|---------|---------|---------|---------------|------------------------------|----------|---------------------|
| 1       | 50         | 128     | 64      | 32      | 0.0010        | 3                            | sum      | 0.198               |
| 2       | 50         | 32      | 32      | 32      | 0.0003        | 9                            | max      | 0.207               |
| 3       | 50         | 256     | 64      | 256     | 0.0004        | 9                            | mean     | 0.193               |
| 4       | 80         | 128     | 256     | 128     | 0.0005        | 7                            | mean     | 0.180               |
| 5       | 60         | 512     | 256     | 128     | 0.0004        | 5                            | set2set  | 0.181               |
| 6       | 50         | 256     | 256     | 128     | 0.0041        | 7                            | mean     | 0.748               |
| 7       | 50         | 128     | 256     | 512     | 0.0008        | 5                            | set2set  | 0.185               |
| 8       | 90         | 64      | 512     | 128     | 0.0009        | 5                            | max      | 0.182               |
| 9       | 60         | 512     | 128     | 128     | 0.0080        | 3                            | sum      | 0.484               |
| 10      | 70         | 64      | 512     | 512     | 0.0300        | 7                            | mean     | 21.519              |
| 11      | 80         | 128     | 512     | 256     | 0.0026        | 5                            | max      | 0.194               |
| 12      | 70         | 128     | 64      | 256     | 0.0010        | 9                            | set2set  | 0.170               |
| 13      | 80         | 32      | 32      | 64      | 0.0042        | 9                            | max      | 0.700               |
| 14      | 70         | 64      | 256     | 32      | 0.0004        | 7                            | set2set  | 0.183               |
| 15      | 70         | 64      | 256     | 32      | 0.0125        | 7                            | max      | 0.627               |
| 16      | 60         | 64      | 32      | 32      | 0.0041        | 5                            | set2set  | 0.542               |
| 17      | 50         | 64      | 512     | 256     | 0.0001        | 7                            | mean     | 0.200               |
| 18      | 80         | 128     | 512     | 512     | 0.0001        | 7                            | set2set  | 0.219               |
| 19      | 100        | 64      | 256     | 128     | 0.0478        | 3                            | max      | 0.411               |
| 20      | 60         | 32      | 64      | 32      | 0.0019        | 9                            | mean     | 0.186               |
| 21      | 90         | 128     | 64      | 512     | 0.0002        | 3                            | sum      | 0.193               |
| 22      | 100        | 256     | 128     | 64      | 0.0950        | 3                            | sum      | 0.430               |
| 23      | 60         | 32      | 64      | 32      | 0.0017        | 9                            | sum      | 0.182               |
| 24      | 90         | 128     | 64      | 512     | 0.0002        | 3                            | sum      | 0.193               |
| 25      | 100        | 256     | 128     | 64      | 0.0951        | 3                            | sum      | 0.651               |
| 26      | 60         | 32      | 64      | 32      | 0.0015        | 9                            | sum      | 0.182               |
| 27      | 90         | 128     | 64      | 512     | 0.0002        | 3                            | sum      | 0.195               |
| 28      | 100        | 256     | 128     | 64      | 0.0098        | 3                            | sum      | 0.529               |
| 29      | 50         | 32      | 64      | 32      | 0.0015        | 9                            | sum      | 0.182               |
| 30      | 90         | 128     | 64      | 512     | 0.0001        | 3                            | sum      | 0.205               |
| 31      | 100        | 256     | 128     | 64      | 0.0103        | 3                            | sum      | 0.519               |
| 32      | 50         | 32      | 32      | 32      | 0.0006        | 9                            | sum      | 0.182               |
| 33      | 90         | 512     | 64      | 512     | 0.0001        | 3                            | sum      | 0.205               |
| 34      | 100        | 256     | 128     | 64      | 0.0221        | 3                            | sum      | 0.500               |
| 35      | 50         | 32      | 32      | 32      | 0.0006        | 9                            | sum      | 0.182               |

|    |     |     |     |     |        |   |         |         |
|----|-----|-----|-----|-----|--------|---|---------|---------|
| 36 | 60  | 512 | 64  | 32  | 0.0024 | 9 | mean    | 0.178   |
| 37 | 90  | 128 | 64  | 512 | 0.0002 | 3 | sum     | 0.193   |
| 38 | 100 | 64  | 256 | 128 | 0.0674 | 3 | max     | 7.438   |
| 39 | 100 | 256 | 128 | 128 | 0.0530 | 3 | max     | 0.389   |
| 40 | 100 | 256 | 256 | 128 | 0.0299 | 5 | max     | 0.490   |
| 41 | 90  | 64  | 256 | 128 | 0.0176 | 3 | max     | 0.465   |
| 42 | 90  | 512 | 256 | 128 | 0.0452 | 3 | max     | 668.718 |
| 43 | 80  | 64  | 256 | 256 | 0.0041 | 5 | max     | 0.240   |
| 44 | 90  | 128 | 64  | 512 | 0.0005 | 3 | sum     | 0.187   |
| 45 | 90  | 128 | 64  | 512 | 0.0002 | 3 | set2set | 0.197   |
| 46 | 90  | 128 | 64  | 512 | 0.0003 | 5 | mean    | 0.197   |
| 47 | 90  | 128 | 512 | 512 | 0.0010 | 7 | sum     | 0.174   |
| 48 | 70  | 128 | 32  | 512 | 0.0003 | 3 | set2set | 0.200   |
| 49 | 90  | 64  | 512 | 256 | 0.0064 | 5 | max     | 0.590   |
| 50 | 80  | 64  | 512 | 128 | 0.0012 | 5 | max     | 0.187   |
| 51 | 70  | 512 | 512 | 128 | 0.0003 | 5 | mean    | 0.191   |
| 52 | 90  | 64  | 512 | 256 | 0.0008 | 5 | max     | 0.179   |
| 53 | 90  | 64  | 512 | 128 | 0.0063 | 5 | set2set | 0.595   |
| 54 | 60  | 512 | 256 | 128 | 0.0008 | 5 | set2set | 0.173   |
| 55 | 60  | 512 | 512 | 128 | 0.0031 | 5 | set2set | 0.227   |
| 56 | 60  | 512 | 256 | 128 | 0.0023 | 5 | set2set | 0.184   |
| 57 | 80  | 512 | 256 | 128 | 0.0005 | 7 | mean    | 0.186   |
| 58 | 80  | 512 | 256 | 128 | 0.0001 | 7 | mean    | 0.210   |
| 59 | 80  | 512 | 256 | 128 | 0.0006 | 7 | mean    | 0.176   |
| 60 | 80  | 128 | 256 | 256 | 0.0004 | 7 | mean    | 0.178   |
| 61 | 60  | 512 | 256 | 64  | 0.0012 | 7 | set2set | 0.198   |
| 62 | 80  | 32  | 32  | 128 | 0.0001 | 7 | mean    | 0.222   |
| 63 | 60  | 128 | 256 | 128 | 0.0019 | 7 | set2set | 0.183   |
| 64 | 70  | 512 | 256 | 64  | 0.0002 | 7 | mean    | 0.199   |
| 65 | 70  | 128 | 32  | 256 | 0.0051 | 9 | set2set | 0.667   |
| 66 | 70  | 128 | 256 | 256 | 0.0009 | 9 | set2set | 0.181   |
| 67 | 70  | 128 | 64  | 32  | 0.0024 | 9 | mean    | 0.189   |
| 68 | 70  | 128 | 64  | 32  | 0.0032 | 9 | mean    | 0.725   |
| 69 | 50  | 128 | 64  | 256 | 0.0033 | 9 | mean    | 0.716   |
| 70 | 60  | 128 | 64  | 32  | 0.0012 | 9 | mean    | 0.177   |
| 71 | 70  | 32  | 64  | 32  | 0.0007 | 9 | mean    | 0.182   |
| 72 | 80  | 256 | 64  | 256 | 0.0018 | 9 | mean    | 0.192   |
| 73 | 60  | 128 | 128 | 32  | 0.0142 | 9 | mean    | 0.634   |
| 74 | 50  | 512 | 64  | 256 | 0.0081 | 9 | mean    | 0.661   |

|     |     |     |     |     |        |   |         |       |
|-----|-----|-----|-----|-----|--------|---|---------|-------|
| 75  | 80  | 128 | 64  | 32  | 0.0006 | 9 | set2set | 0.176 |
| 76  | 70  | 128 | 64  | 256 | 0.0015 | 9 | mean    | 0.176 |
| 77  | 60  | 512 | 128 | 32  | 0.0022 | 9 | mean    | 0.189 |
| 78  | 80  | 256 | 32  | 256 | 0.0010 | 7 | set2set | 0.174 |
| 79  | 70  | 32  | 64  | 64  | 0.0003 | 9 | mean    | 0.189 |
| 80  | 50  | 128 | 64  | 32  | 0.0048 | 9 | set2set | 0.674 |
| 81  | 60  | 128 | 128 | 256 | 0.0005 | 7 | mean    | 0.190 |
| 82  | 80  | 512 | 64  | 32  | 0.0027 | 9 | mean    | 0.183 |
| 83  | 70  | 256 | 32  | 256 | 0.0013 | 7 | set2set | 0.180 |
| 84  | 100 | 128 | 64  | 64  | 0.0036 | 9 | mean    | 0.715 |
| 85  | 90  | 128 | 512 | 512 | 0.0011 | 7 | sum     | 0.181 |
| 86  | 90  | 512 | 512 | 512 | 0.0058 | 9 | sum     | 0.659 |
| 87  | 60  | 32  | 512 | 512 | 0.0076 | 7 | sum     | 1.425 |
| 88  | 90  | 128 | 512 | 512 | 0.0007 | 9 | sum     | 0.180 |
| 89  | 60  | 512 | 512 | 512 | 0.0113 | 7 | sum     | 0.799 |
| 90  | 70  | 128 | 512 | 512 | 0.0021 | 9 | sum     | 0.178 |
| 91  | 50  | 64  | 512 | 512 | 0.0009 | 7 | set2set | 0.181 |
| 92  | 90  | 256 | 64  | 32  | 0.0027 | 9 | sum     | 0.189 |
| 93  | 100 | 512 | 256 | 128 | 0.0004 | 5 | set2set | 0.187 |
| 94  | 60  | 32  | 512 | 256 | 0.0003 | 5 | set2set | 0.183 |
| 95  | 70  | 128 | 128 | 512 | 0.0008 | 5 | set2set | 0.178 |
| 96  | 90  | 512 | 256 | 128 | 0.0002 | 5 | set2set | 0.206 |
| 97  | 60  | 128 | 32  | 64  | 0.0014 | 5 | set2set | 0.196 |
| 98  | 70  | 64  | 512 | 256 | 0.0005 | 5 | set2set | 0.178 |
| 99  | 50  | 512 | 256 | 128 | 0.0006 | 5 | set2set | 0.202 |
| 100 | 100 | 128 | 256 | 512 | 0.0017 | 5 | set2set | 0.185 |
| 101 | 90  | 256 | 512 | 256 | 0.0004 | 7 | max     | 0.195 |
| 102 | 60  | 32  | 128 | 128 | 0.0003 | 5 | set2set | 0.183 |
| 103 | 70  | 128 | 32  | 512 | 0.0008 | 7 | sum     | 0.188 |
| 104 | 90  | 512 | 256 | 64  | 0.0011 | 5 | set2set | 0.171 |
| 105 | 60  | 128 | 512 | 128 | 0.0001 | 7 | set2set | 0.208 |
| 106 | 70  | 64  | 256 | 256 | 0.0041 | 5 | sum     | 0.328 |
| 107 | 50  | 512 | 128 | 512 | 0.0007 | 3 | max     | 0.180 |
| 108 | 100 | 128 | 32  | 128 | 0.0002 | 7 | set2set | 0.198 |
| 109 | 90  | 256 | 512 | 256 | 0.0019 | 5 | sum     | 0.176 |
| 110 | 80  | 256 | 32  | 256 | 0.0009 | 7 | set2set | 0.188 |
| 111 | 80  | 256 | 32  | 256 | 0.0002 | 7 | set2set | 0.297 |
| 112 | 80  | 256 | 32  | 256 | 0.0037 | 3 | set2set | 0.205 |
| 113 | 80  | 256 | 32  | 256 | 0.0029 | 5 | set2set | 0.189 |

|            |           |            |           |            |               |          |                |              |
|------------|-----------|------------|-----------|------------|---------------|----------|----------------|--------------|
| 114        | 80        | 256        | 32        | 256        | 0.0159        | 7        | set2set        | 0.622        |
| 115        | 80        | 256        | 32        | 256        | 0.0218        | 5        | set2set        | 0.709        |
| 116        | 80        | 256        | 32        | 256        | 0.0048        | 3        | set2set        | 0.243        |
| 117        | 60        | 256        | 32        | 256        | 0.0014        | 7        | set2set        | 0.189        |
| <b>118</b> | <b>70</b> | <b>256</b> | <b>32</b> | <b>256</b> | <b>0.0010</b> | <b>9</b> | <b>set2set</b> | <b>0.168</b> |
| 119        | 60        | 32         | 256       | 64         | 0.0001        | 5        | set2set        | 0.220        |
| 120        | 80        | 512        | 256       | 128        | 0.0075        | 7        | max            | 0.672        |
| 121        | 70        | 64         | 32        | 256        | 0.0003        | 9        | set2set        | 0.218        |
| 122        | 50        | 256        | 64        | 256        | 0.0005        | 3        | set2set        | 0.185        |
| 123        | 60        | 512        | 128       | 128        | 0.0003        | 5        | set2set        | 0.181        |
| 124        | 100       | 32         | 256       | 256        | 0.0002        | 7        | max            | 0.199        |
| 125        | 80        | 256        | 64        | 64         | 0.0088        | 9        | set2set        | 0.578        |
| 126        | 70        | 512        | 32        | 128        | 0.0020        | 5        | set2set        | 0.177        |
| 127        | 60        | 64         | 64        | 256        | 0.0364        | 9        | set2set        | 0.857        |
| 128        | 70        | 512        | 256       | 128        | 0.0004        | 7        | set2set        | 0.181        |
| 129        | 80        | 256        | 128       | 256        | 0.0007        | 3        | max            | 0.186        |
| 130        | 100       | 32         | 32        | 64         | 0.0015        | 9        | set2set        | 0.180        |
| 131        | 50        | 512        | 64        | 256        | 0.0001        | 5        | set2set        | 0.217        |
| 132        | 60        | 256        | 256       | 128        | 0.0055        | 7        | set2set        | 0.632        |
| 133        | 70        | 64         | 64        | 256        | 0.0024        | 9        | set2set        | 0.180        |
| 134        | 80        | 512        | 256       | 128        | 0.0012        | 5        | max            | 0.173        |
| 135        | 60        | 256        | 32        | 256        | 0.0782        | 7        | set2set        | 0.813        |
| 136        | 70        | 32         | 128       | 64         | 0.0006        | 3        | set2set        | 0.186        |
| 137        | 90        | 512        | 256       | 64         | 0.0004        | 5        | set2set        | 0.180        |
| 138        | 90        | 512        | 256       | 64         | 0.0011        | 5        | set2set        | 0.173        |
| 139        | 90        | 512        | 256       | 64         | 0.0017        | 5        | max            | 0.175        |
| 140        | 90        | 512        | 256       | 64         | 0.0010        | 5        | set2set        | 0.194        |
| 141        | 90        | 512        | 256       | 64         | 0.0008        | 5        | set2set        | 0.178        |
| 142        | 90        | 512        | 256       | 64         | 0.0030        | 5        | set2set        | 0.185        |
| 143        | 100       | 512        | 256       | 64         | 0.0070        | 5        | set2set        | 0.628        |
| 144        | 50        | 512        | 256       | 64         | 0.0002        | 5        | set2set        | 0.191        |
| 145        | 60        | 512        | 256       | 64         | 0.0037        | 5        | max            | 0.237        |
| 146        | 80        | 512        | 256       | 64         | 0.0010        | 5        | set2set        | 0.171        |
| 147        | 90        | 512        | 64        | 32         | 0.0005        | 5        | set2set        | 0.197        |
| 148        | 70        | 512        | 256       | 128        | 0.0021        | 5        | set2set        | 0.169        |
| 149        | 80        | 128        | 32        | 256        | 0.0006        | 9        | set2set        | 0.179        |
| 150        | 60        | 64         | 256       | 64         | 0.0014        | 5        | set2set        | 0.185        |
| 151        | 70        | 256        | 64        | 256        | 0.0009        | 7        | set2set        | 0.176        |
| 152        | 90        | 512        | 32        | 128        | 0.0002        | 9        | set2set        | 0.287        |

|     |     |     |     |     |        |   |         |         |
|-----|-----|-----|-----|-----|--------|---|---------|---------|
| 153 | 50  | 128 | 128 | 256 | 0.0017 | 5 | set2set | 0.195   |
| 154 | 100 | 256 | 256 | 32  | 0.0012 | 7 | set2set | 0.240   |
| 155 | 80  | 32  | 64  | 128 | 0.0006 | 5 | set2set | 0.192   |
| 156 | 60  | 512 | 32  | 256 | 0.0003 | 9 | set2set | 0.375   |
| 157 | 70  | 128 | 256 | 64  | 0.0004 | 3 | set2set | 0.180   |
| 158 | 90  | 64  | 64  | 256 | 0.0024 | 7 | set2set | 0.176   |
| 159 | 80  | 256 | 256 | 128 | 0.0007 | 5 | set2set | 0.181   |
| 160 | 60  | 512 | 32  | 256 | 0.0044 | 9 | set2set | 0.722   |
| 161 | 70  | 128 | 128 | 64  | 0.0010 | 9 | set2set | 0.187   |
| 162 | 70  | 256 | 64  | 32  | 0.0016 | 9 | max     | 0.184   |
| 163 | 70  | 512 | 256 | 128 | 0.0028 | 9 | set2set | 0.207   |
| 164 | 70  | 32  | 32  | 256 | 0.0003 | 9 | set2set | 0.189   |
| 165 | 70  | 128 | 256 | 256 | 0.0008 | 9 | sum     | 0.178   |
| 166 | 70  | 256 | 64  | 64  | 0.0010 | 9 | set2set | 0.198   |
| 167 | 70  | 512 | 32  | 128 | 0.0034 | 9 | set2set | 0.744   |
| 168 | 70  | 64  | 256 | 256 | 0.0005 | 9 | mean    | 0.183   |
| 169 | 70  | 512 | 128 | 32  | 0.0019 | 9 | set2set | 0.180   |
| 170 | 70  | 128 | 64  | 64  | 0.0097 | 9 | max     | 0.654   |
| 171 | 70  | 256 | 32  | 256 | 0.0013 | 9 | set2set | 0.174   |
| 172 | 90  | 512 | 256 | 64  | 0.0011 | 9 | sum     | 0.170   |
| 173 | 90  | 512 | 256 | 64  | 0.0022 | 5 | set2set | 0.184   |
| 174 | 90  | 32  | 64  | 64  | 0.0053 | 3 | set2set | 0.240   |
| 175 | 90  | 128 | 256 | 64  | 0.0062 | 9 | set2set | 0.575   |
| 176 | 90  | 256 | 32  | 64  | 0.0005 | 5 | mean    | 0.182   |
| 177 | 90  | 64  | 512 | 64  | 0.0011 | 9 | max     | 0.176   |
| 178 | 90  | 512 | 128 | 64  | 0.0006 | 5 | set2set | 0.181   |
| 179 | 90  | 128 | 256 | 64  | 0.0041 | 5 | sum     | 0.256   |
| 180 | 90  | 512 | 64  | 64  | 0.0004 | 9 | set2set | 0.195   |
| 181 | 90  | 256 | 32  | 64  | 0.0015 | 3 | set2set | 0.177   |
| 182 | 80  | 32  | 256 | 64  | 0.0002 | 5 | set2set | 0.210   |
| 183 | 50  | 512 | 64  | 512 | 0.0025 | 9 | set2set | 0.653   |
| 184 | 100 | 128 | 256 | 64  | 0.0002 | 5 | mean    | 0.200   |
| 185 | 70  | 256 | 512 | 128 | 0.0122 | 9 | set2set | 0.717   |
| 186 | 70  | 512 | 32  | 128 | 0.0019 | 5 | max     | 0.195   |
| 187 | 70  | 64  | 128 | 256 | 0.0022 | 9 | set2set | 0.194   |
| 188 | 70  | 128 | 256 | 256 | 0.0032 | 3 | sum     | 0.192   |
| 189 | 70  | 512 | 64  | 128 | 0.0222 | 5 | set2set | 102.544 |
| 190 | 70  | 256 | 32  | 512 | 0.0044 | 5 | set2set | 0.484   |
| 191 | 70  | 32  | 256 | 32  | 0.0067 | 9 | set2set | 0.701   |

|     |     |     |     |     |        |   |         |       |
|-----|-----|-----|-----|-----|--------|---|---------|-------|
| 192 | 70  | 512 | 256 | 256 | 0.0017 | 5 | mean    | 0.185 |
| 193 | 70  | 128 | 64  | 128 | 0.0037 | 9 | set2set | 0.682 |
| 194 | 80  | 256 | 512 | 256 | 0.0009 | 5 | max     | 0.195 |
| 195 | 70  | 512 | 32  | 256 | 0.0088 | 3 | set2set | 0.479 |
| 196 | 70  | 64  | 128 | 128 | 0.0028 | 9 | sum     | 0.225 |
| 197 | 80  | 128 | 256 | 32  | 0.0021 | 5 | set2set | 0.174 |
| 198 | 70  | 512 | 64  | 512 | 0.0008 | 9 | set2set | 0.173 |
| 199 | 50  | 256 | 32  | 256 | 0.0013 | 5 | set2set | 0.177 |
| 200 | 100 | 32  | 256 | 128 | 0.0006 | 9 | mean    | 0.191 |

## References

- (1) Bergstra, J.; Yamins, D.; Cox, D. D. Making a Science of Model Search: Hyperparameter Optimization in Hundreds of Dimensions for Vision Architectures. In *ICML; 2013; Vol. 28*, pp 115–123. <https://doi.org/10.1080/01459740.2015.1058375>.
